# Supplementary material for: Dasatinib cessation after deep molecular response exceeding 2 years and natural killer cell transition during dasatinib consolidation
Source: PubMed Central journal article supplement — Cancer Sci. 2017 Nov 29;109(1):182–92. doi: 10.1111/cas.13430 (PMC5765311; doi:10.1111/cas.13430), 2017-11-29

# Fig. S1 Flow cytometric analysis for the peripheral blood cells

## (A) Lymphocyte gating for peripheral blood

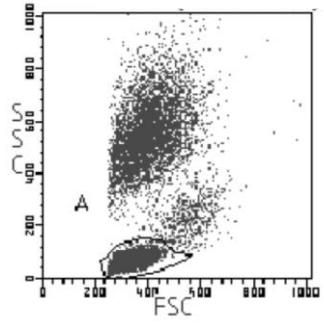

## (B) Two or 3 color analysis for NK and T cells

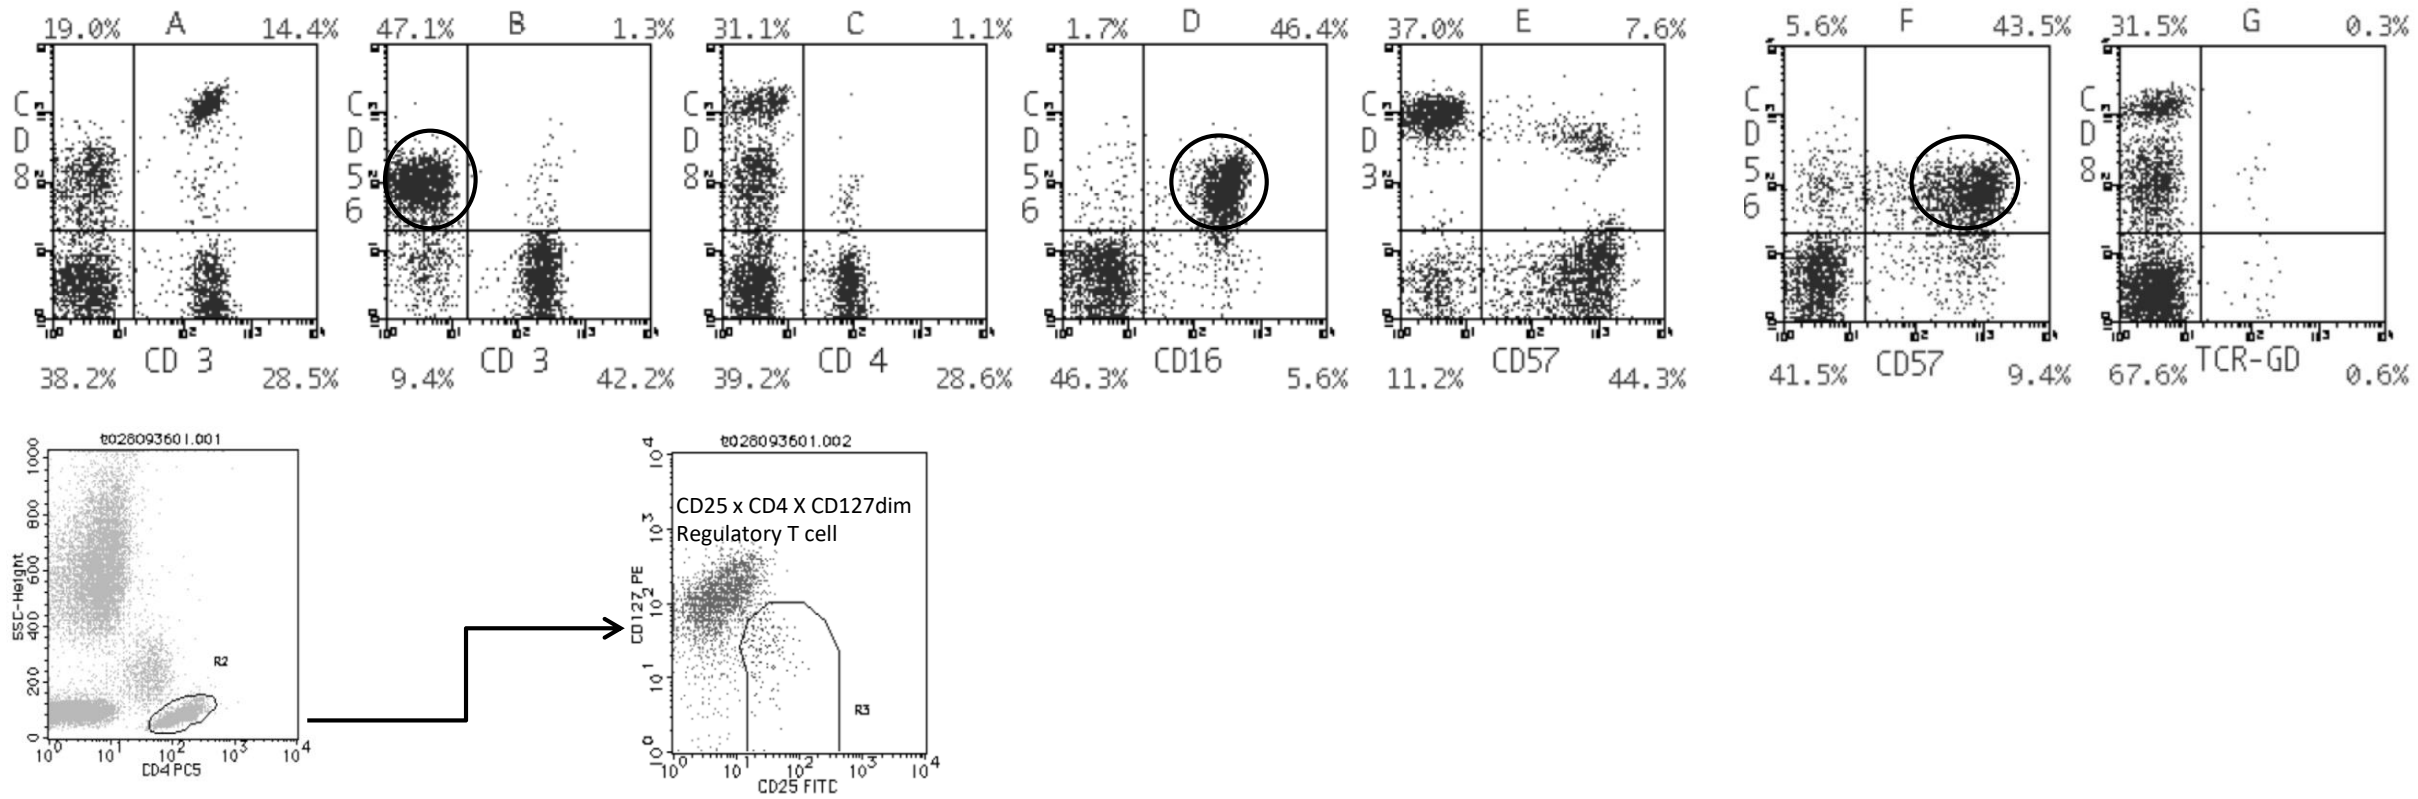

Supplement: CAS-109-182-s001.pdf [file CAS-109-182-s001.pdf]
