# Supplementary material for: Dasatinib cessation after deep molecular response exceeding 2 years and natural killer cell transition during dasatinib consolidation
Source: PubMed Central journal article supplement — Cancer Sci. 2017 Nov 29;109(1):182–92. doi: 10.1111/cas.13430 (PMC5765311; doi:10.1111/cas.13430), 2017-11-29

**Fig. S2** Profiles of the CD16+CD56+ NK and CD56+CD57+ NK-LGL cell subsets during consolidation

Proportions (%) and absolute cell counts of CD16+CD56+ NK and CD56+CD57+ NK-LGL cells are shown in Fig. S2A-1, S2A-2, S2B-1 and S2B-2.

CD16+CD56+ NK cells

Figure S 2A-1

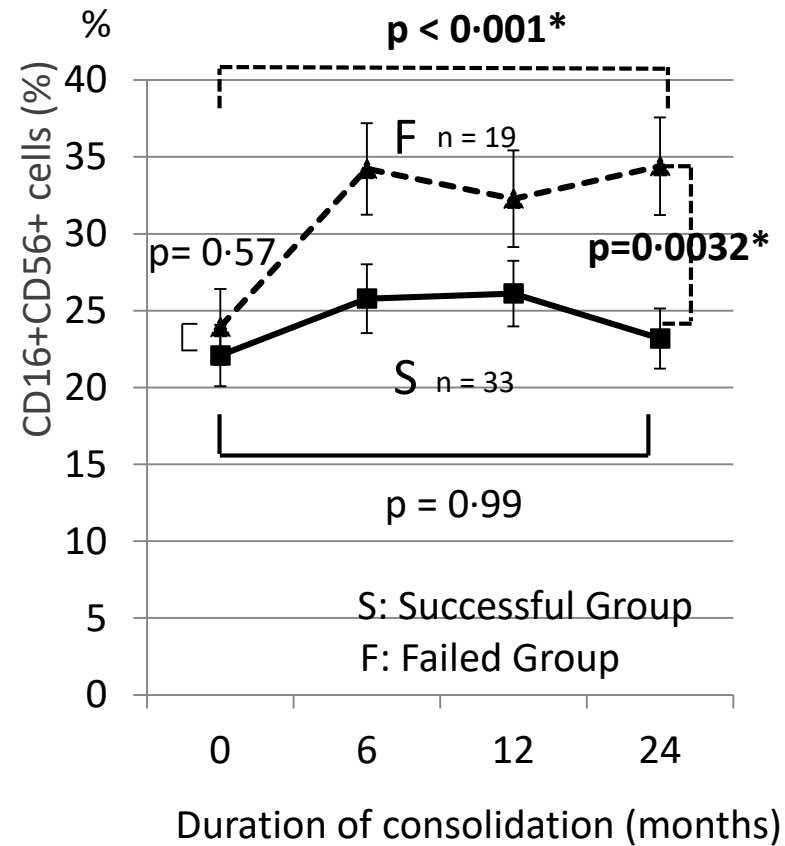

Figure S 2A-2

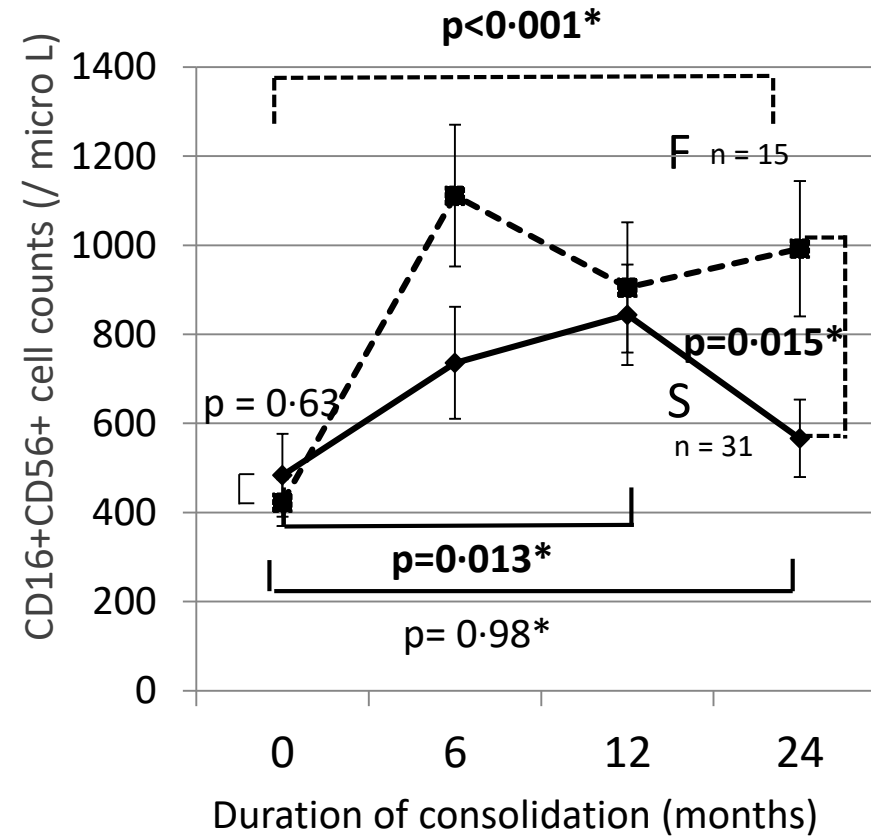

Supplement: CAS-109-182-s002.pdf [file CAS-109-182-s002.pdf]
