# Supplementary material for: Dasatinib cessation after deep molecular response exceeding 2 years and natural killer cell transition during dasatinib consolidation
Source: PubMed Central journal article supplement — Cancer Sci. 2017 Nov 29;109(1):182–92. doi: 10.1111/cas.13430 (PMC5765311; doi:10.1111/cas.13430), 2017-11-29
Supplement: CAS-109-182-s004.pdf [file CAS-109-182-s004.pdf]

**Fig. S3** Multivariate analysis of the predictive factors for TFS

Results of the multivariate analysis for TFS

| <b>Factor</b>                                              | <b>Hazard ratio</b> | <b>p-value</b> |
|------------------------------------------------------------|---------------------|----------------|
| <b>Duration of TKI (<math>\leq 90</math>months)</b>        | 1.51 (0.40–4.86)    | 0.49           |
| <b>Gender (male)</b>                                       | 1.42 (0.35–5.75)    | 0.63           |
| <b>Total dose of dasatinib (<math>&gt; 72600</math>mg)</b> | 1.12 (0.33–3.77)    | 0.85           |
| <b>CD3-CD56+ NK (<math>\geq 41\%</math>)</b>               | 5.21 (1.50–10.05)   | 0.0093         |
