# Supplementary material for: Dasatinib cessation after deep molecular response exceeding 2 years and natural killer cell transition during dasatinib consolidation
Source: PubMed Central journal article supplement — Cancer Sci. 2017 Nov 29;109(1):182–92. doi: 10.1111/cas.13430 (PMC5765311; doi:10.1111/cas.13430), 2017-11-29

## Fig. S4 Profiles of the T cell subsets during consolidation

Proportions (%) and absolute cell numbers of CD4-8+, CD3+CD57+, CD4+CD8-, and CD4+CD25+CD127<sup>dim/-</sup> cells are shown

in Fig. S4A, S4B, S4C, and S4D, respectively.

### CD4-CD8+ Cytotoxic T cells

Figure S 4A-1

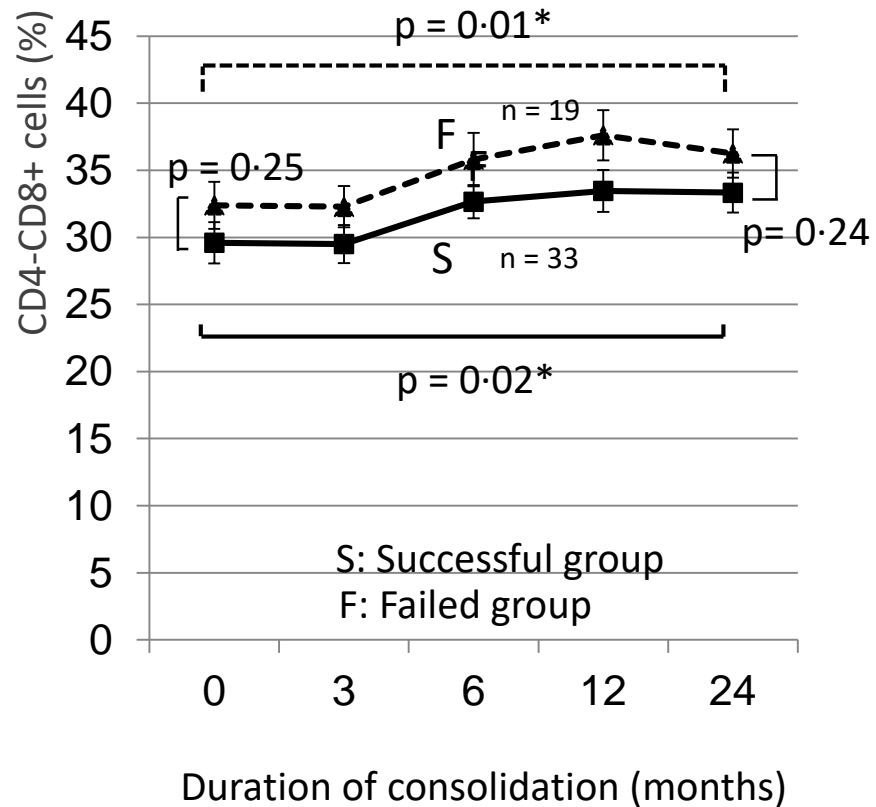

Figure S 4A-2

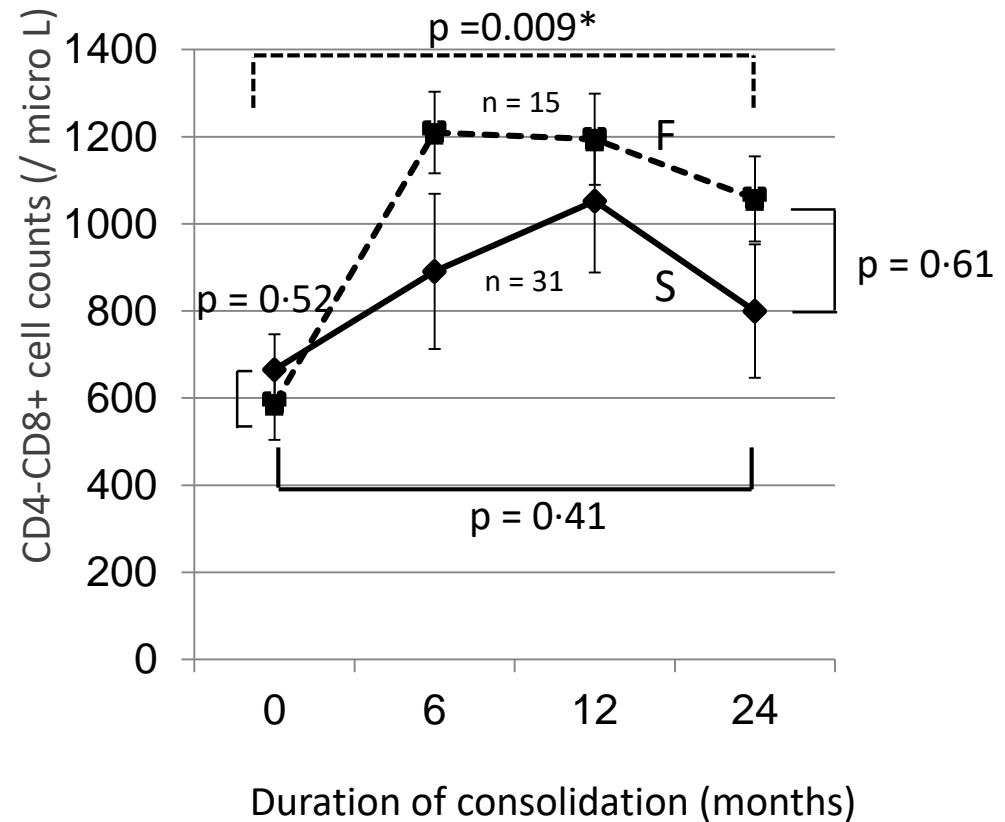

Supplement: CAS-109-182-s005.pdf [file CAS-109-182-s005.pdf]
