# Supplementary figures and images for: Dasatinib cessation after deep molecular response exceeding 2 years and natural killer cell transition during dasatinib consolidation
Source: PubMed Central journal article supplement — Cancer Sci. 2017 Nov 29;109(1):182–92. doi: 10.1111/cas.13430 (PMC5765311; doi:10.1111/cas.13430), 2017-11-29

CD56+CD57+ NK-LGL cells

Figure S 2B-1

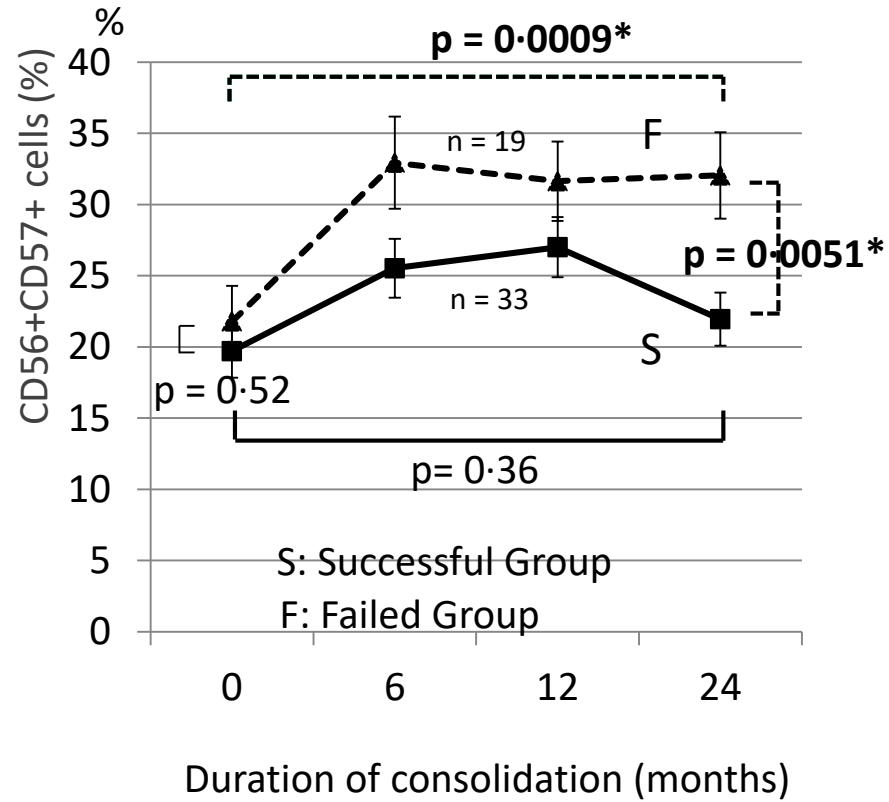

Figure S 2B-2

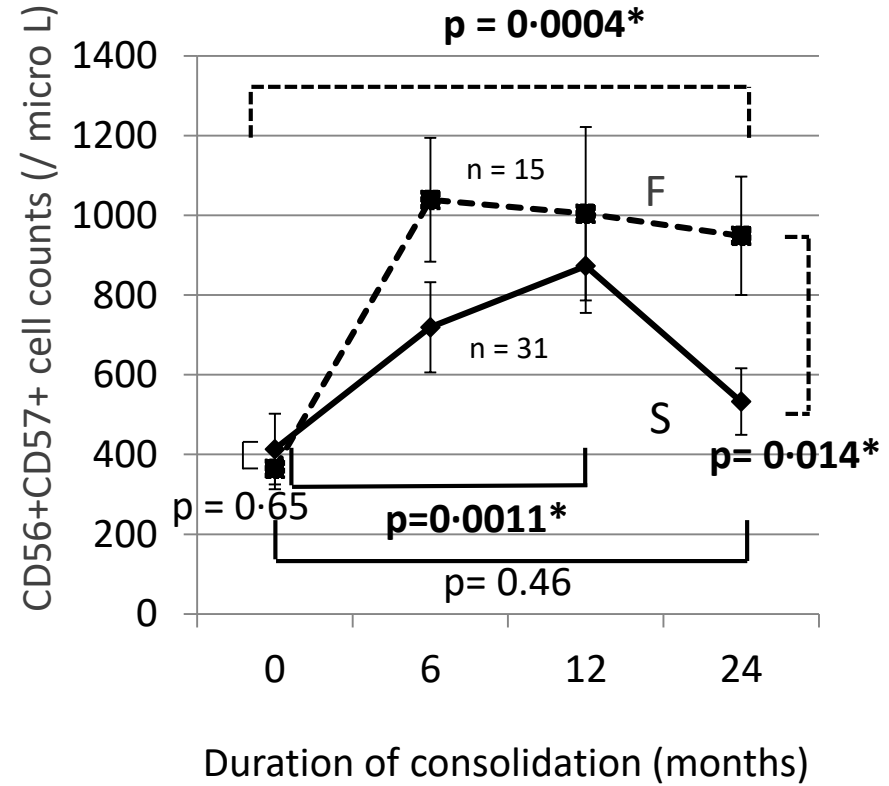

Supplement: CAS-109-182-s003.pdf [file CAS-109-182-s003.pdf]

## CD3+CD57+ T-LGL cells

Figure S 4B-1

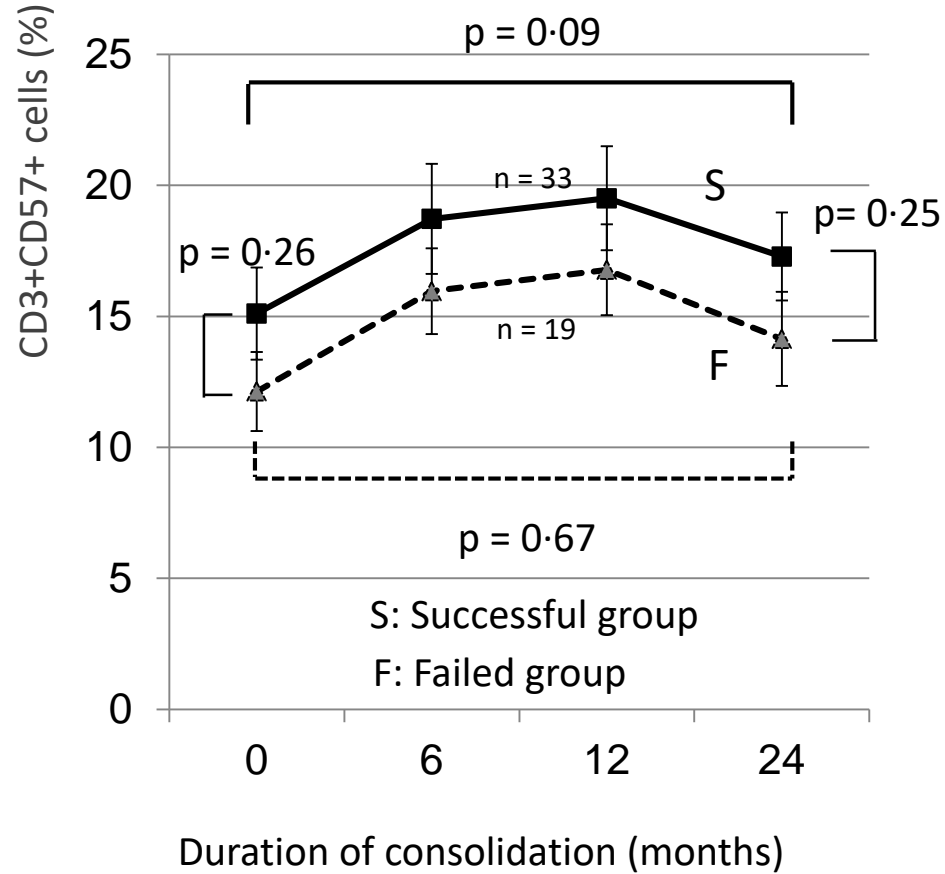

Figure S 4B-2

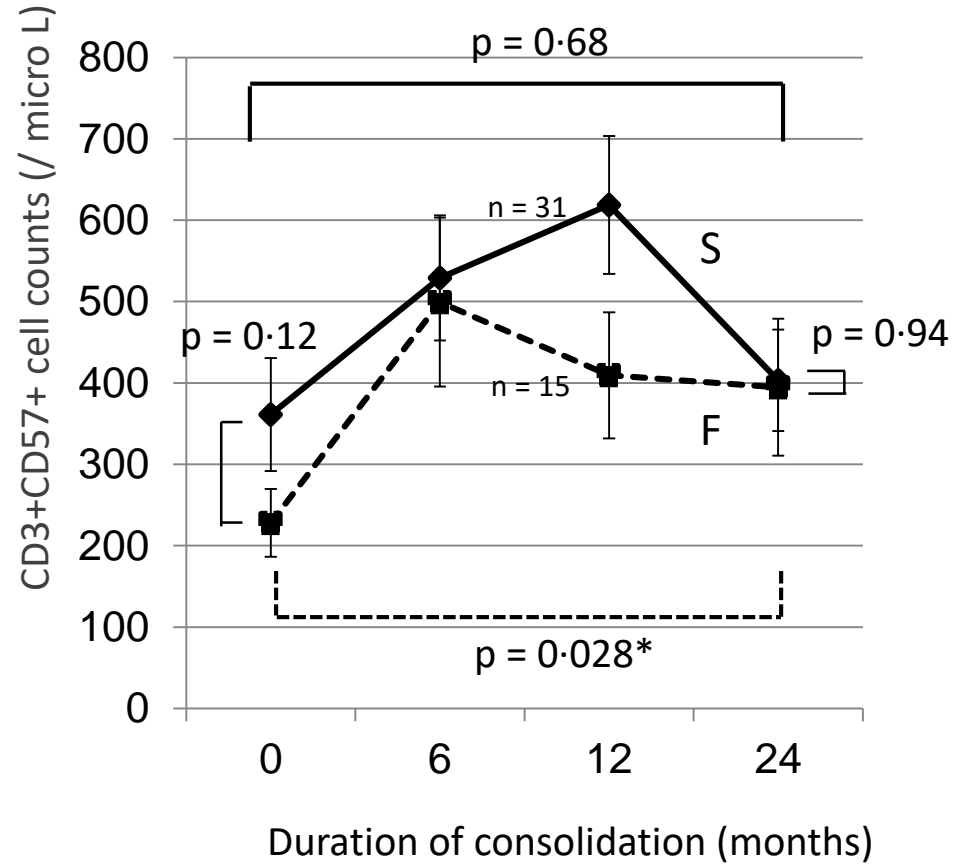

Supplement: CAS-109-182-s006.pdf [file CAS-109-182-s006.pdf]

# CD4+CD8- Helper T cells

Figure S 4C-1

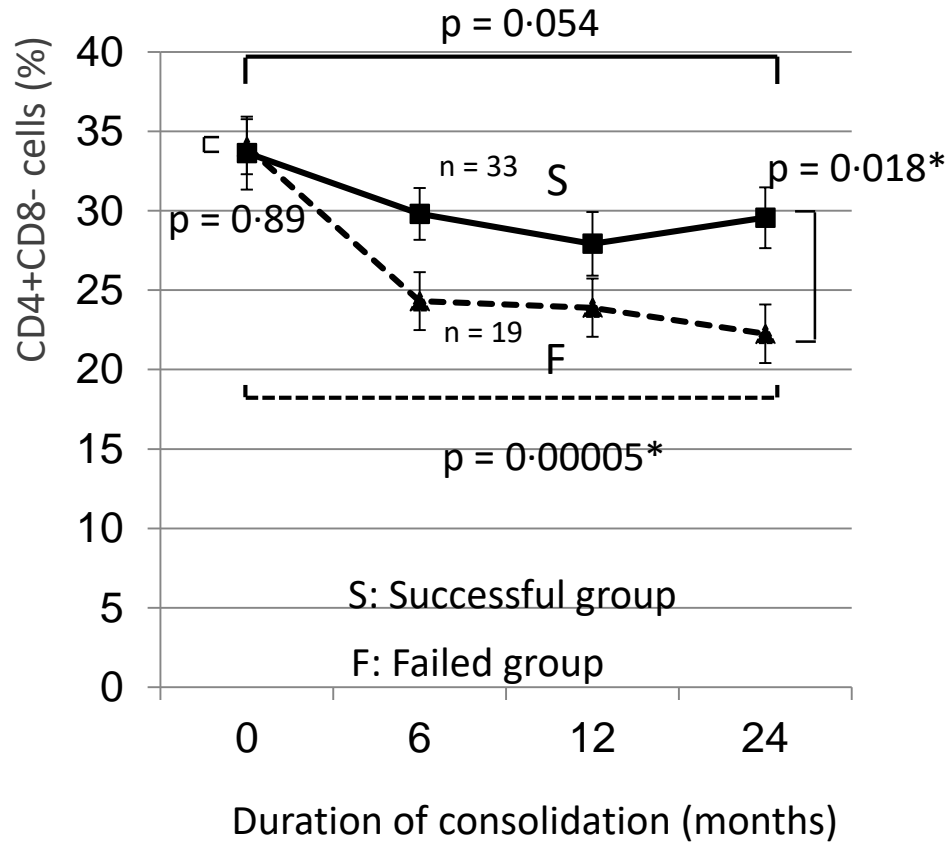

Figure S 4C-2

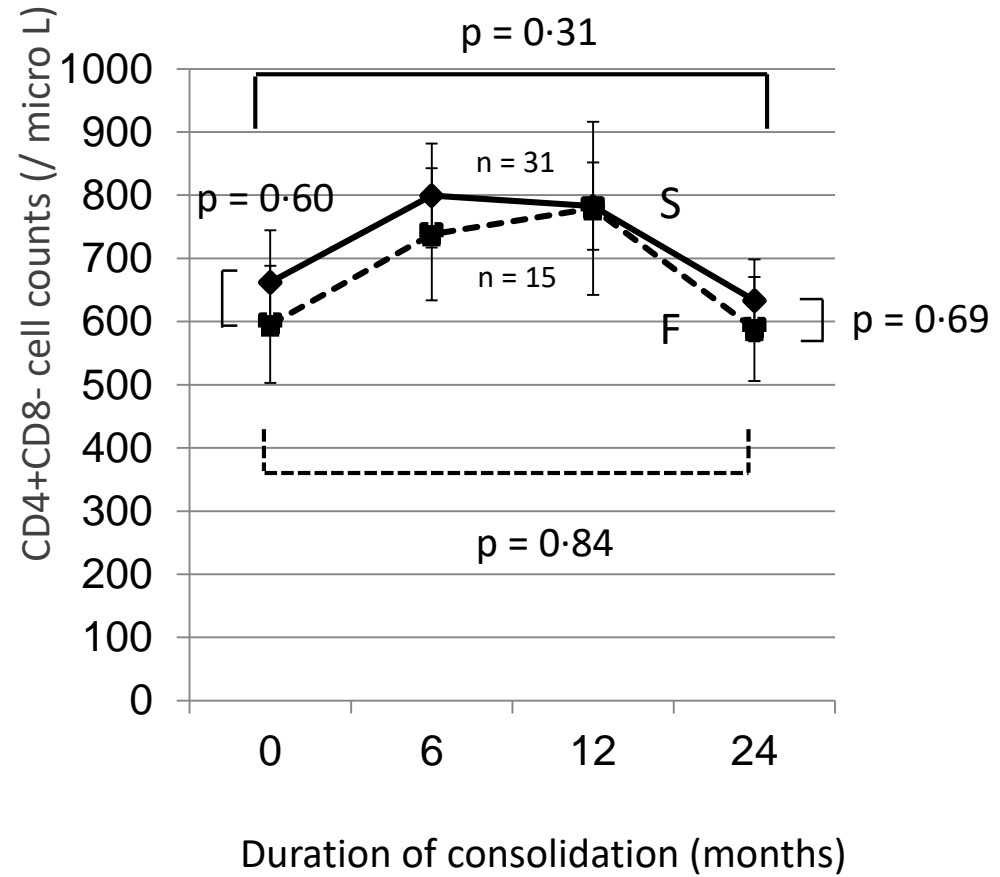

Supplement: CAS-109-182-s007.pdf [file CAS-109-182-s007.pdf]

# CD4+CD25+CD127<sup>dim/-</sup> Regulatory T cells

Figure S 4D-1

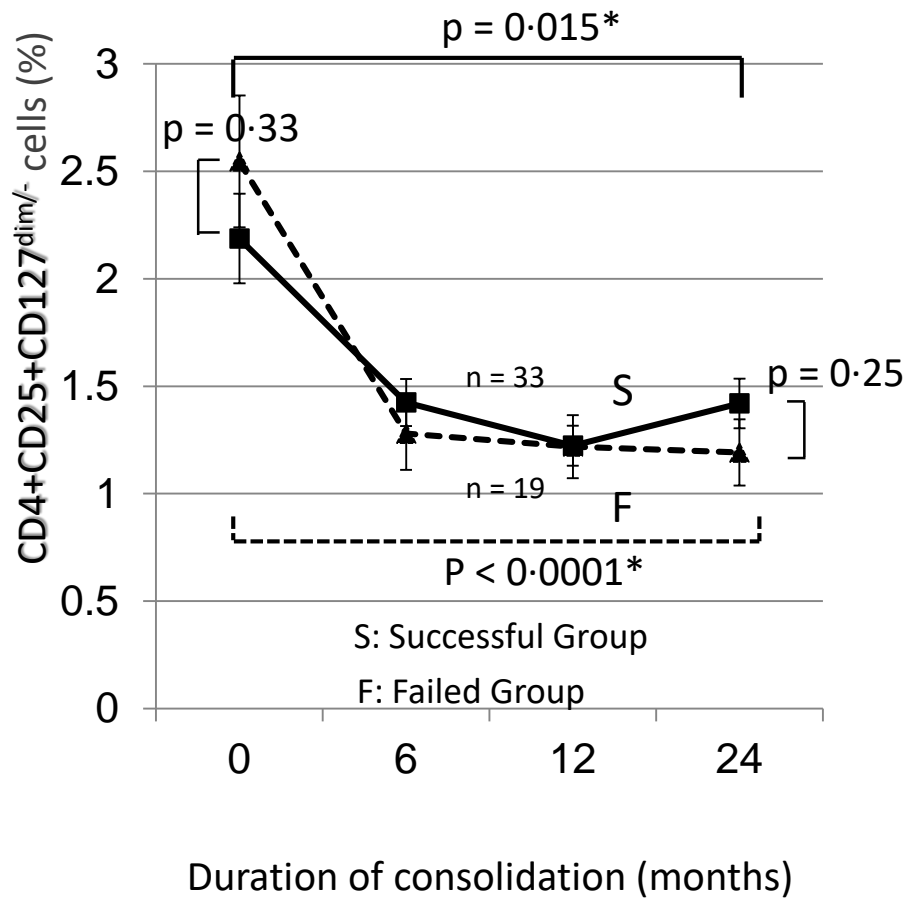

Figure S 4D-2

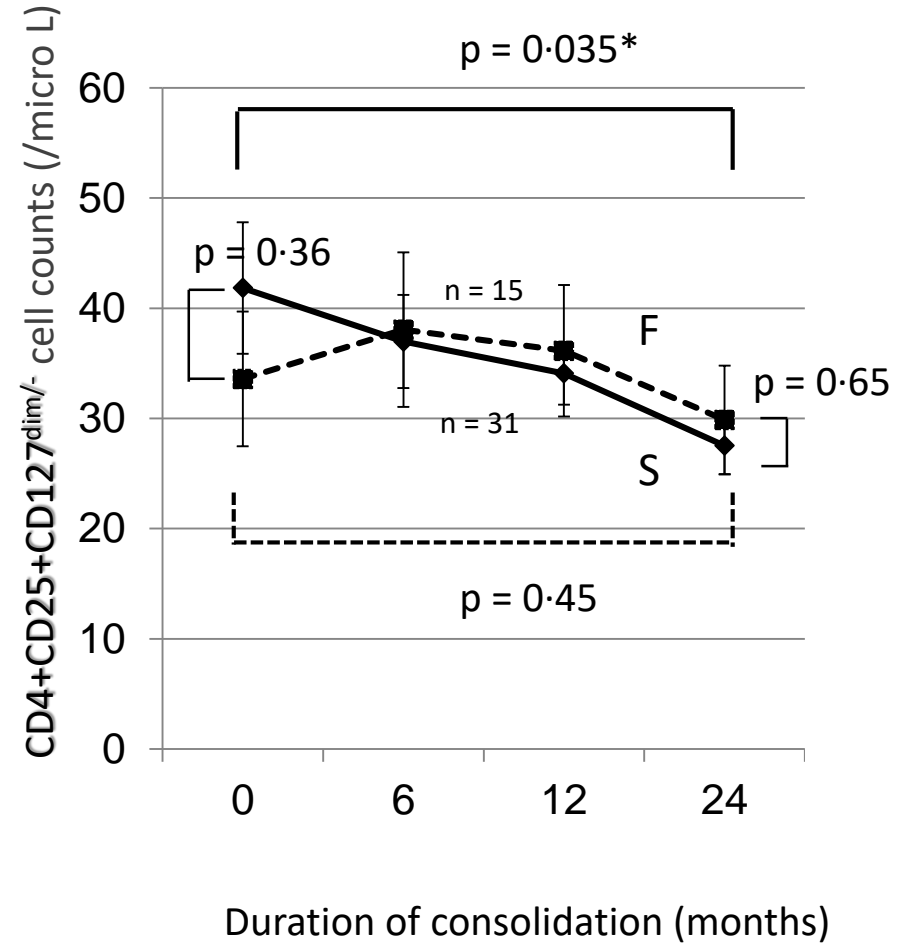

Supplement: CAS-109-182-s008.pdf [file CAS-109-182-s008.pdf]
